# Supplementary material for: The Effect of Resistance Training for Elderly with Mild Cognitive Impairment and Frailty: A Randomized Controlled Trial
Source: Research Square preprint supplement (doi:10.21203/rs.3.rs-3978424/v1), 2024-03-13
Supplement: Supplementary file 1 [file 0ac48a1e4aae6126a7799fd1.docx]

**Supplementary**

**Step 1: Needs Assessment…………………………………………………………………………1**

**Step 2:** **Identifying Objectives……………………………………………………………………5**

**Step 3 Intervention Design………………………………………………………………………6**

**Step 4 Intervention Production…………………………………………………………………13**

**The results of process evaluation indicators ……………………………………………………19**

**Participant satisfaction profiles regarding the intervention……………………………………19**

**References…………………………………………………………………………………………21**

**Step 1: Needs Assessment**

Semi-structured interviews were conducted to analyze facilitators and barriers to physical activity, aiming to clarify the specific exercise needs of the participants.

**(1) Participants**

Recruitment at Fujian Provincial Hospital's outpatient department utilized purposive sampling. The inclusion criteria encompassed adults aged 60 or older who had a thorough evaluation utilizing the MoCA, MMSE, Barthel Index, and Fried Frailty Scale to identify elderly individuals with MCI and frailty. The exclusion criteria encompassed acute illnesses, serious psychiatric disorders, interview refusal, and communication impediments. The sample size for interviews was determined according to the principle of information saturation.

**(2) Data Collection**

The interviews were conducted by the co-author (XXW), who holds a master's degree in Geriatric Nursing and is trained in qualitative research methodologies. A preliminary interview with three subjects helped develop the following interview outlines:

1. How do you perceive your physical fitness recently?

2. Do you engage in regular exercise?

3. What factors help/motivate you to continue exercising, and what are the barriers?

4. Do you believe exercise is important?

5. How does active participation in exercise affect you?

6. Does your health condition impact your daily exercise routines, and if so, how?

7. In an ideal exercise scenario, where would you prefer to exercise and why? Would you like a workout partner, and why? What type of exercise do you enjoy, and why? Would you like someone to encourage you to exercise, and why?

Interviews were held in the quiet environment of the hospital's outpatient clinic. Before beginning, the researcher explained the purpose and process of the interview to the patients, and upon consent, the sessions were recorded and noted. The interviewer listened attentively, posed appropriate follow-up questions, and responded promptly to ensure comprehensive and accurate representation of the participants' views and attitudes. Each interview lasted 15-20 minutes, with the audio content transcribed and analyzed promptly after each session.

**(3) Data Analysis**

The interviewer transcribed the recordings verbatim, supplementing with notes on patients' expressions and body language. The transcribed and verified documents were then imported into NVivo 11 software for analysis using thematic analysis, a common approach in descriptive qualitative research. The process began with familiarization with the raw data, followed by initial coding. Themes were then identified by categorizing and comparing the initial codes. The themes underwent rigorous review and refinement, establishing necessary interconnections between them, and providing preliminary conclusions for the research findings.

**(4) Findings**

Fifteen participants were included in the interviews, labeled A1 to A15. The group comprised 10 females and 5 males, with an average age of 70.7±4.0 years, ranging between 65 to 78 years. Detailed patient information can be found in Table S1.

Table S1 Information of participants

| **ID** | **Gender** | **Age** | **Education Level** | **Form of Exercise** | **Frequency of Exercise** |
| --- | --- | --- | --- | --- | --- |
| A01 | Male | 72 | University | Walking | 1h/7d |
| A02 | Female | 65 | High School | Walking | 1h/2d |
| A03 | Male | 65 | High School | Walking | 2h/7d |
| A04 | Female | 74 | High School | Walking | 1h/7d |
| A05 | Male | 77 | Middle School | Walking | 0.5h/5d |
| A06 | Female | 73 | Elementary | None | None |
| A07 | Female | 70 | Middle School | None | None |
| A08 | Female | 66 | Middle School | Calisthenics | 20min/5d |
| A09 | Female | 68 | High School | Walking | 0.5h/7d |
| A10 | Female | 71 | High School | Tai Chi | 1h/5d |
| A11 | Female | 74 | High School | Walking | 0.5h/7d |
| A12 | Female | 70 | Middle School | Walking | 1h/7d |
| A13 | Male | 78 | University | Walking | 0.5h/7d |
| A14 | Female | 69 | Middle School | Walking | 0.5h/3d |
| A15 | Male | 68 | Elementary | Walking | 1.5h/7d |

**The data analysis resulted in the identification of six main themes:** 1) Acknowledgment of exercise's importance, 2) Favoring outside exercise, 3) Desire for social engagement, 4) Influence of health and weather on exercise, 5) Require exercise guidance, and 6) Need for balanced exercise supervision.

**1) Acknowledgment of exercise's importance:** The interviewees believe in the substantial benefits of physical exercise, such as improving mental health, enhancing physical strength, conserving energy, and promoting better digestion and sleep. In their view, exercise is especially vital for the elderly.

A01: "I think we should exercise. For those of us with not-so-great cardiovascular health, it's even more important as we age."

A013: "Why do I keep it up? Because I have several health issues. To strengthen myself, I exercise."

A04: "I think exercise is very important. I do hand exercises, about six or seven sessions each night. It's really good for the heart."

A06: "Of course, exercise is important."

A14: "I think as you get older, you really should get out and walk."

A15: "Definitely, there are benefits. It helps me relax. Nowadays, I find it hard to read books. I get tired quickly, my eyesight isn't great. I can't even keep up with reading on WeChat, just the headlines. My eyes don't want to read anymore, and honestly, I don't want to read those things either."

**2) Coordinated group training and home-based exercises:** Elderly individuals desire to participate in offline activities to foster social interactions, yet they are concerned about the impact of the pandemic and time constraints preventing them from attending these events regularly.

A01: "That environment, being close to nature, is essential. Living in high-rises just doesn't cut it."

A02: "Exercising alone just doesn't feel as engaging. Having someone to exercise with, even if we're not doing the same thing, is definitely better."

A08: "When you're outdoors, you often bump into friends and acquaintances to chat with. That kind of atmosphere is better; it boosts people's willingness to be active."

A04: “At times, when we have to look after our grandchildren and manage household chores, we worry that we might not make it to the in-person group workouts as scheduled.”

A15: "With the current COVID situation, I'm also concerned about the risk of infection."

**3) Influence of health and weather on exercise:** The interviewees often chose not to exercise due to poor weather, health issues, caregiver duties, or a decrease in enthusiasm and interest for learning.

A03: "Sometimes when it rains too hard, I might not go out. But if it stops, I'll go for a walk."

A06: "I go out in the summer, but not when it's too cold. I don't really feel like it. My physical strength isn't great, and I get out of breath easily."

A07: "You see, my husband has Parkinson's for over 10 years now. I have to take care of him, and it's tiring. I go out when I can, but sometimes I just can't."

A11: "If you teach me how to exercise, I'll learn. But my eagerness to learn isn't what it used to be. I'm not that bothered about finding new activities."

A14: "I spend more time sitting because of the kids. They keep me busy, otherwise I'd like to go out for walks."

**4) Require exercise guidance:** Despite the information-rich era of big data, there's a clear gap in accessing professional exercise knowledge and choosing exercises that suit personal conditions.

A05: "We have health information and guidelines, but we don't really follow them. The movements are too fast, and we don't have the stamina for them."

A08: "How do I exercise safely? What kind of activities should I do?"

A13: "I do look at some stuff on my phone and try exercises that seem suitable for me."

A14: "You need professional knowledge, of course. There's a lot of information out there, but much of it on the internet is not accurate."

**5) Need for balanced exercise supervision:** Regarding the need for supervision, some elderly people view it as well-intentioned, while others feel it adds pressure and hinders the sustainability of exercise, advising caution with task-based exercise monitoring methods.

A01: "I don't need supervision. I am self-disciplined."

A02: "I don't have a good temper, so during supervision, I might just say I'm busy with something else. Being rushed is annoying. A reminder now and then would be okay."

A05: "I don't like being supervised; it feels restrictive. But I might consider it if occasionally suggested."

A12: "No need for that. We remember to exercise daily."

A13: "No need for supervision, it feels like a chore. No reminders necessary either."

**Step 2:** **Identifying Objectives**

Synthesizing the results from semi-structured interviews and through deliberations within the research team, we have established intervention targets and strategies for elderly individuals with MCI and frailty. These interventions address the high awareness of exercise but low self-efficacy, the lack of exercise guidance, social interaction needs, and the judicious use of supervision. The devised intervention matrix for this study is as follows:

Table S2 Matrix of objectives

| **Barrier/Facilitator** | **Objective** | **Strategy** |
| --- | --- | --- |
| High exercise awareness but low self-efficacy | Enhance self-efficacy | Implement encouraging and reward-based exercise teaching and supervision to boost self-efficacy and exercise compliance. |
| Lack of exercise guidance | Obtain professional exercise guidance | Provide personalized guidance through phased, multimodal teaching approaches, including on-site, online, and telephonic follow-ups, along with exercise booklets. |
| Social interaction needs | Fulfill the elderly's need for social participation | Utilize group training methods within healthcare institutions. |
| Physical function issues | Offer suitable Enhance Physical and Cognitive Functions | Tailor resistance training methods and intensities for frail seniors; for those with MCI and memory issues, increase teaching frequency or provide reviewable written materials. |

**Step 3 Intervention Design**

**(1) System review**

**Search strategy:** Searches were conducted of PubMed, Embase, the Cochrane Library, CINAHL, JBI, China Knowledge Network, Wanfang Database, VIP, as well as platforms including OVID and Google Scholar. The search covered all records up to November 2020, with strategies tailored to each database's specifications. A combination of subject terms and free words was used for the search. Chinese terms included equivalents for 'resistance exercise', 'strength training', 'mild cognitive impairment', 'frailty', and 'weakness'; English terms included "mild cognitive impairment", "MCI," "frail*", "resistance training", "strength training". Retrieved records were imported into EndNote X9 for de-duplication and further selection.

**Inclusion/exclusion criteria:** Articles were eligible for inclusion: Studies involving frail or MCI elderly individuals; exercise-based interventions without concurrent cognitive therapies; outcomes related to cognitive and physical functions; experimental research or guidelines related to exercise rehabilitation; randomized controlled trials; publications in English or Chinese. Studies focused on conditions such as hypertension, diabetes, nephrotic syndrome, or depression; review studies, letters or conference abstracts were excluded along with literature not available in full text.

**Data extraction:** Details extracted included author(s), publication year, study participants, exercise content, intensity, duration, frequency, intervention period, methods, and related research tools.

**Results:** The search yielded 1,387 articles, from which 18 were included after deduplication, initial screening, and full-text review: 14 original studies and 4 guidelines. This research involved coding and organizing the exercise regimens from the 14 original studies and extracting pertinent information. The basic information of the included literature is shown in Table S3.

**(2) Intervention protocol draft**

Based on the literature study and qualitative analysis, the research team has developed an initial workout program with the goal of improving the cognitive and physical abilities of the participants. The draft takes into account the exercise ability, physical function, and safety of the participants. The details of the strategy are outlined in Table S4, which establishes the foundation for the initial edition of the resistance training regimen.

Table S3 Basic information table of the included literature

| **Author/Year** | **Study Population** | **Exercise Protocol** | **Training Content** | **Training Intensity** | **Intervention Duration/Frequency/Session Length** | **Intervention Method** | **Exercise Tools** |
| --- | --- | --- | --- | --- | --- | --- | --- |
| Seynnes et al. (2004)[1] | Frail elderly | Not mentioned | Progressive resistance training focused on joints, 6-8 seconds per repetition, 1-2 minutes rest between sets | High resistance: 80% of 1-RM; Low resistance: 40% of 1-RM | 10 weeks, 3 times/week, 3 sets/session, 8 reps/set | Face-to-face concentrated intervention | Not mentioned |
| Hess, J.A et al. (2006)[2] | Frail elderly | 20 minutes warm-up followed by training | Lower limb flexor machines + variable resistance exercises | Progressive increase to 80% of 1-RM for 8 reps/set | 10 weeks, 3 times/week, 3 sets/session | Face-to-face concentrated intervention | Hammer flexor machines, Maxicam variable resistance machines |
| Lustosa et al. (2011)[3] | Pre-frail elderly women | Not mentioned | Lower limb exercises increasing load in both open and closed kinetic chain movements | 70% of 1-RM | 10 weeks, 3 times/week, 1 hour/session | Guided by a physiotherapist, group instruction | Not mentioned |
| Nagamatsu et al. (2012)[4] | Elderly with MCI | Not mentioned | Free weight lifting; load increased upon completion of each set | 2 sets/session, 6-8 reps/set | 26 weeks, 2 times/week, 1 hour/session | Qualified fitness instructor face-to-face guidance | Pneumatic resistance equipment |
| Fiatarone et al. (2014)[5] | Elderly with MCI | Not mentioned | Progressive resistance training: chest press, leg press, seated row, standing hip abduction, knee extension | 3 sets/session, 5 exercises/set, 8 reps/exercise | 24 weeks, 2 times/week, 75 minutes/session |  |  |

Table S3(Continue)

| **Author/Year** | **Study Population** | **Exercise Process** | **Training Content** | **Training Intensity** | **Intervention Period/Frequency/Duration** | **Intervention Approach** | **Exercise Tools** |
| --- | --- | --- | --- | --- | --- | --- | --- |
| Yoon et al. (2017)[6] | Elderly women with MCI | Warm-up for 10 min, training for 40 min, cool-down for 10 min | Unspecified exercises following the American College of Sports Medicine's guidelines for the elderly | High intensity: 2-3 sets of 12-15 reps; Low intensity: 2-3 sets of 8-10 reps | 12 weeks, 2 days/week, 1 hour/session | Face-to-face concentrated intervention | Resistance bands |
| Greblo et al. (2017)[7] | Elderly with MCI | Not mentioned | Handle pushing and pulling exercises in various postures, grips, and directions with isometric contraction for 5-7 seconds | 50%-75% of maximum contraction force | 8 weeks, 3 times/week, 30 minutes/session | Not mentioned | Not mentioned |
| Sahin et al. (2018)[8] | Hospitalized frail patients | Warm-up for 10 min, training for 20 min, cool-down for 10 min | Lower limb strengthening exercises including hip flexion, extension, and abduction; Upper limb strengthening including shoulder and elbow flexion and extension, 6-10 reps per set | High intensity: 70% of 1-RM; Low intensity: 40% of 1-RM | 8 weeks, 3 times/week, 40 minutes/session | Guided by physiotherapist, group instruction | Dumbbells, adjustable ankle strap devices |
| Hong et al. (2018)[9] | Elderly with MCI | Warm-up for 10 min, training for 40 min, cool-down for 10 min | Resistance training based on resistance bands, details not provided | 65% of 1-RM | 12 weeks, 2 days/week, 1 hour/session | Face-to-face concentrated intervention | Resistance bands |
| Yoon et al. (2018)[10] | Elderly with MCI and frailty | Warm-up for 10 min, training for 40 min, cool-down for 10 min | Exercises including seated row, single leg press, pectoral fly, seated leg raise, lateral raise, half squat, wide squat, bridge | 2-3 sets/session, 12-15 reps/set | 16 weeks, 3 days/week, 1 hour/session |  |  |

Table S3(Continue)

| **Author/Year** | **Study Population** | **Exercise Process** | **Training Content** | **Training Intensity** | **Intervention Duration/Frequency/Session Length** | **Intervention Method** | **Exercise Tools** |
| --- | --- | --- | --- | --- | --- | --- | --- |
| Tsai et al. (2019)[11] | Elderly with amnestic MCI | Warm-up 5 min, exercise 30 min, cool-down 5 min | Bicep curls, vertical chest fly, leg presses, seated row, hamstring curls, and calf raises. 10 reps per exercise, 90 sec rest between exercises, 2 min rest between sets | 60-75% of 1-RM | 16 weeks, 3 days/week, 40 min/session | Supervised by therapists with face-to-face intervention | Resistance bands |
| Cardalda et al. (2019)[12] | Elderly with mild to moderate cognitive impairment and frailty | Warm-up 10 min, exercise 45 min, cool-down 5 min | Lower limb exercises: plantar and dorsiflexion, knee extensor and flexor muscles, abductor muscles, hip rotators | 2-3 sets/session, 10-15 reps/set | 12 weeks, 2 days/week, 1 hour/session | Group intervention by professionals in geriatric sports | Therabands resistance bands |
| Chen Rujie et al. (2019)[13] | Pre-frail elderly | Warm-up, exercise, cool-down | Side bow pulls, chest presses, lateral raises, standing leg lifts, seated knee extensions, standing hip extensions, single-leg stands, toe stands | 2 sets/session, 10-15 reps/set | 8 weeks, 3 days/week, 45-60 min/session | Guided by physiotherapists, group instruction | Resistance bands |
| Liu Yan (2020)[14] | Pre-frail elderly | 5-10 min warm-up and cool-down activities before and after training | Side bow pulls, chest presses, lateral raises, standing leg lifts, seated knee extensions, standing leg kickbacks, toe raises | 2-4 sets/session, 8-12 reps/set | 8 weeks, 3 days/week, 30 min/session | Nursing staff | TheraBand resistance bands in yellow |

Table S4 Resistance training program (draft 1)

| **Phase** | **Target muscle** | **Movements** | **Duration** | **Intensity** | **Frequency** | **Tools** | **Notes** |
| --- | --- | --- | --- | --- | --- | --- | --- |
| Initial (1-6 weeks) | Shoulders, Upper Limbs, Chest, Back, Glutes, Thighs, Calves | **Shoulder:** Seated External Shoulder Rotation, Dumbbell Lateral Raise with Rotation, Resistance Band Lateral Raise.  **Chest:** Elbow Squeeze Chest Expansion, Seated Pectoral Fly, Resistance Band Frontal Chest Stretch.  **Back:** Shoulder Shrugs and Depression, Standing Scapular Retraction, Resistance Band Seated Row.  **Upper Limbs:** Vertical Arm Swings, Stationary Arm Swing 'Running'.  **Glutes:** Standing Hip Extension, Standing Lateral Leg Raise, Resistance Band Lateral Leg Raise.  **Thighs:** Standing Alternating Leg Curl, Single-Leg Balance with Chair Support.  **Calves:** Ankle Dorsiflexion and Plantarflexion, Single-Leg Calf Raise. | Warm-up: 5 min Training: 20 min Relaxation: 5 min | 40% 1-RM Borg Scale: 10-14 | 1.Weekly group training once, home practice once  2.Monthly health education session  3.Monthly telephone follow-up | 1.Exercise guidance manual  2.Exercise log 3. Elastic bands  4.Exercise wristbands | 1. Selecting exercise time 2. Training intervals  3. Exercise equipment  4. Post-exercise considerations |
| Mid-term (7-9 weeks) | Combination of 3-4 muscle groups | Warm-up: 5min Training:30 min Relaxation: 5 min | 50% 1-RM Borg Scale: 10-14 |
| Final (10-12 weeks) | Full set of exercises | Warm-up: 5 min Training: 40 min Relaxation: 5 min | 60% 1-RM Borg Scale: 10-14 |

**Step 4 Intervention Production**

**(1) Expert consultation**

**Selection of Delphi Panel Experts:** For the study's purpose and adhering to Delphi method requirements, experts were identified from the fields of geriatric medicine, geriatric nursing, neurology, rehabilitation or sports medicine. The selection criteria were as follows: (1) professional involvement in the aforementioned specialties, (2) a minimum qualification of a bachelor's degree, (3) over five years of experience in their field, (4) an associate senior professional title or higher, and (5) consent to participate in this research. Eight experts were chosen, including three from sports rehabilitation medicine, two neurologists, and three geriatric nursing specialists. Detailed information about the experts can be found in Table S5.

Table S5: Experts Information

| **Expert** | **Age** | **Gender** | **Education** | **Specialty** | **Professional Title** | **Years of Experience** |
| --- | --- | --- | --- | --- | --- | --- |
| A | 40 | Female | PhD | Geriatric Nursing | Associate Senior | 17 |
| B | 65 | Male | Bachelor's | Sports Rehabilitation Medicine | Senior | 40 |
| C | 43 | Female | Master's | Geriatric Nursing | Associate Senior | 20 |
| D | 47 | Female | PhD | Geriatric Nursing | Senior | 20 |
| E | 47 | Male | PhD | Neurology | Senior | 19 |
| F | 50 | Male | Bachelor's | Sports Rehabilitation Medicine | Senior | 27 |
| G | 52 | Female | Bachelor's | Neurology | Associate Senior | 29 |
| H | 55 | Female | PhD | Sports Rehabilitation Medicine | Senior | 18 |

**Results:** Two rounds of the Delphi method were employed, with eight questionnaires distributed in each phase, achieving a 100% return rate, indicating commendable expert engagement. The authority coefficient (Cr) is calculated as the average of competence (Ca) and confidence (Cs) scores, yielding Cr = (0.89 + 0.78) / 2 = 0.84. A Cr > 0.7 denotes a high level of expert authority, lending credibility to the results. Variability coefficients for both rounds were <0.25, and significance tests for coordination coefficients were p < 0.05, indicating consensus among experts. A summary of expert feedback and the revision of the protocol is provided in Table S6.

Table S6 Expert opinions and proposal revisions

| **Item** | **Expert Opinion** | **Revision Content** |
| --- | --- | --- |
| Exercise Content | 1. Is stretching necessary in warm-up exercises?  2. Should preliminary testing assess frail patients' tolerance levels before resistance training?  3. Are the numerous movements, even with video aids, too complex for elderly execution? Additionally, how are the movements related to cognitive impairment when primarily targeting physical frailty? | 1. Static stretching removed, hip rotation exercises added.  2. Physical activity capability assessments were conducted, and the intervention intensity followed recommended guidelines.  3. Removed two exercises utilizing resistance bands, adjusted the intervention approach. |
| Intensity | Measuring 1RM poses risks and is impractical in elderly populations. | Intensity settings were based on the number of repetitions and sets rather than 1RM measurements. |
| Duration | Consider intermittent rest during resistance training; recommend 1 minute of rest after each exercise and 2 minutes between sets. | Rest intervals were increased, with 2 minutes between sets and 1 minute after each exercise. |
| Frequency | Suggest three or more sessions weekly; question whether twice-weekly sessions provide sufficient activity. | Revised to three weekly sessions; two of which are concentrated group training. |
| Intervention Method | Should caregivers be involved? | Caregiver involvement is optional but they can assist with recording or photographing. |
| Intervention Tools | 1. Recommend integrating the instructional manual with follow-along videos.  2. Provide training videos or manuals to ensure home exercise completion. | Exercise guidance videos were added to supplement the manual. |
| Precautions | Include attention to exercise intolerance or discomfort during and after the session; suggest adding guidelines for handling such instances. | Provided instructions for managing exercise intolerance or discomfort during sessions. |

**(2) Polit study**

**Aim:** The quasi-experimental study established the applicability and safety of the intervention for patients with MCI and frailty, laying the groundwork for subsequent RCT.

**Participants:** Recruitment commenced in December 2020 at the Fujian Provincial Hospital outpatient clinic. **The inclusion criteria were as follows:** (1) age 60 years or older; (2) diagnosis of Mild Cognitive Impairment (MCI) according to established criteria; (3) presence of at least one of the five physical characteristics defined in the Fried frailty phenotype; (4) no barriers to language communication; and (5) informed consent and voluntary participation in the study. **Exclusion criteria included:** (1) poorly controlled hypertension; (2) severe anxiety or depression; (3) history of psychiatric illness, severe physical functional impairment (including stroke-induced hemiplegia), or terminal illness, such as speech or hearing disorders and end-stage cancer; (4) inability to walk 10 meters independently; (5) lack of access to a smart device with internet connectivity; and (6) concurrent participation in other studies.

**Interventions:** Participants were enrolled in a four-week exercise program consisting of two weekly group sessions and one home-based session, totaling twelve interventions. The regimen focused on basic movements for seven major muscle groups, lasting approximately 30 minutes each session. Patient well-being was closely monitored for any adverse events during the interventions. Additionally, a dedicated WeChat group was established to maintain frequent communication with participants, providing timely exercise reminders and health education.

**Outcome measures** included pre- and post-intervention physiological parameters and fatigue level scores, alongside the observation of adverse events.

**1) Physiological Parameters:** Blood pressure and heart rate were monitored before exercise and after rest to observe changes in participants.

**2) Perceived Fatigue:** The Borg Rating of Perceived Exertion Scale was used to assess subjective fatigue post-exercise, aiding in determining the suitability of the exercise intensity for the population.

**3) Incidence of Exercise-Related Adverse Events:** The number of adverse events occurring throughout the intervention was recorded, with detailed analysis of each event and exploration of possible causes.

**4) Responses to the Intervention:** thoughts and recommendations from both participants and intervenors regarding their acceptance of the exercise program.

**Results:** The pilot study incorporated nine elderly individuals with Mild Cognitive Impairment and frailty, including four males and five females with an average age of 69. Basic demographic and exercise habit information for these participants is presented in Table S7.

Table S7 characteristics of participants in the polit study

| **No.** | **Age** | **Gender** | **Education** | **Exercise Form** | **Exercise Frequency** |
| --- | --- | --- | --- | --- | --- |
| 1 | 62 | Male | High School | Walking | 1h/7d |
| 2 | 71 | Female | High School | Walking | 1h/5d |
| 3 | 65 | Male | High School | Walking | 2h/7d |
| 4 | 68 | Female | High School | Walking | 0.5h/7d |
| 5 | 68 | Female | Middle School | Walking | 1h/7d |
| 6 | 71 | Female | Middle School | Walking | 1h/7d |
| 7 | 77 | Male | Middle School | Walking | 0.5h/5d |
| 8 | 74 | Male | High School | Walking | 1h/7d |
| 9 | 65 | Female | High School | Walking | 1h/2d |

**The physiological parameters, fatigue levels, and incidence of adverse events**：Blood pressure was measured before and after each of the eight group intervention sessions, and fatigue was scored post-intervention. Three patients missed one session each, yet compliance was generally high. No exercise-related adverse events occurred during either the group sessions or home exercises. Detailed information on physiological indicators and fatigue levels pre- and post-exercise is provided in Table S8.

Table S8 Outcomes of the intervention in the polit study

| **Measurement (Unit)** | **Pre-Exercise** | **Post-Exercise** |
| --- | --- | --- |
| Heart Rate (beats/min) | 73.1±8.6 | 69.8±8.1 |
| Systolic Pressure (mmHg) | 119.2±17.4 | 120.9±15.7 |
| Diastolic Pressure (mmHg) | 69.0±8.3 | 71.8±9.7 |
| Fatigue Level (score) | —— | 10.4±0.9 |

**Response of the intervention**

1) Participants: The experiences and viewpoints of the participants were gathered after the intervention. According to the majority, the workout was at a suitable intensity and the movements were simple to master and had a clear flow to the activity. They thought that taking part in the exercise intervention improved their health, and they especially valued the safety monitoring offered by wristbands and the blood pressure readings taken before and after the exercise, which gave them peace of mind by alerting them to physiological changes. During group interventions, elder participants' visual clarity concerns were addressed through the use of slideshows and background music, which increased their interest and involvement in exercise. Every participant expressed satisfaction with this therapeutic strategy. But they also mentioned a number of problems:①occasional amnesia of movement topics and class timings; ②a desire for bilateral arm motions that are more difficult; ③reduced capacity for learning, which raises questions regarding learning new motions; ④a desire for each session to include health education; ⑤lack of desire to practice at home and a desire for slower-moving training videos; ⑥A recommendation for more regimented at-home activities, such as homework assignments, perhaps through the sharing of pertinent practice materials in a WeChat group.

2) Intervenors: The intervention's pilot phase revealed a number of problems that the researchers noted: ①Distracting ring tones from mobile phones during group lessons; ② Non-standard movement execution; ③ Losing track of motion, which creates an illusion of disparity; ④The necessity of controlling the temperature in the classroom, especially the air conditioning, since some senior participants didn't bring water bottles, which caused dehydration; ⑤Although there were videos and workout manuals available, it was not obvious enough to only name the exercises for at-home practice; ⑥Difficulties with paper-based activity recording; participants would rather document their workouts with photos or videos than with standard exercise logs. The final intervention plan was formed by revising the intervention protocol in response to these observations and comments.

**Revised the protocol:**

1) Group Based Training: ①Proactive scheduling reminders will be integrated within the collective instructional sessions. Participants will receive telephonic notifications one hour prior to each class as a reinforcement measure, coupled with directives to set cellular devices to silent mode, thereby ensuring optimal classroom discipline. ②In alignment with the requisites for patient-centered health education, a concise ten-minute lecture focusing on health-related knowledge will be imparted at the culmination of each collective training session, concurrently facilitating participant relaxation and rest. ③ Addressing the relative simplicity of the prescribed arm movement repertoire, the exercise protocol will be refined to encompass seated reverse hand elevations and thumb-to-palm coordination activities. ④ Participants demonstrating reduced learning velocities or challenges in movement mastery will receive tailored encouragement and iterative demonstrative instructions, as necessitated by their individual learning trajectories. ⑤ Subsequent to the intervention's conclusion, participant blood pressure metrics will be recorded, with an incentivizing stamp being affixed to their activity participation manual. This measure not only serves as a motivational tool for sustained exercise engagement but also as a reminder for forthcoming collective training sessions.

2) Home Based Training ① Researchers are required to disseminate the current week's exercise presentation to the intervention group's WeChat group one day prior to the home practice session, coupled with reminders for participants to engage in self-directed practice and document their activities through photographs or video recordings. ② Given that the instructional videos encompass a comprehensive set of exercises, participants initially perceived a lack of clarity regarding the weekly exercise plan, especially during the initial stages focusing on basic movements. To address this, supplemental weekly exercise presentations will be provided, with reminders for home-based training being sent via WeChat group messages. Additionally, timely feedback and encouragement will be offered in response to the exercise videos submitted by participants. ③ Considering the participants' discomfort with paper-based exercise logging and their preference for simplicity in home practice routines, the task of maintaining exercise record sheets will be eliminated. Instead, the safety of home-based exercises will be monitored through heart rate tracking facilitated by fitness wristbands.

**Process evaluation indicators**

Table S9: Pre- and post-exercise physiological parameters and fatigue levels between groups

| **Variables** | **Groups** | **Pre-exercise** | **Post-exercise** |
| --- | --- | --- | --- |
| Heart rate, times/min | Resistance group（n=33） | 69.2±6.8 | 70.7±9.8 |
|  | Control group（n=32） | 65.7±9.4 | 72.7±5.2 |
| Systolic blood pressure, mmHg | Resistance group（n=33） | 123.1±15.3 | 118.6±15.9 |
|  | Control group（n=32） | 116.9±9.0 | 118.4±11.9 |
| Diastolic blood pressure, mmHg | Resistance group（n=33） | 69.4±8.1 | 72.4±10.0 |
|  | Control group（n=32） | 73.0±7.8 | 66.3±7.1 |
| Rating of perceived exertion, score | Resistance group（n=33） | —— | 11.0±1.1 |
|  | Control group（n=32） | —— | 9.3±0.8 |

**Participant satisfaction profiles regarding the intervention**

Table S10 Participant Satisfaction Levels

| **Item** | **Group** | **Very Satisfied (n, %)** | **Satisfied (n, %)** | **Neutral (n, %)** | **Dissatisfied (n, %)** | **Very Dissatisfied (n, %)** |
| --- | --- | --- | --- | --- | --- | --- |
| **Curriculum Design** | RT group | 29 (87.88) | 4 (12.12) | 0 (0) | 0 (0) | 0 (0) |
| Control group | 21 (65.63) | 10 (31.25) | 1 (3.13) | 0 (0) | 0 (0) |
| **Teaching Methodology** | RT group | 28 (84.85) | 5 (15.15) | 0 (0) | 0 (0) | 0 (0) |
| Control group | 21 (65.63) | 10 (31.25) | 1 (3.13) | 0 (0) | 0 (0) |
| **Facility Provision** | RT group | 25 (75.76) | 6 (18.18) | 0 (0) | 0 (0) | 0 (0) |
| Control group | 22 (68.75) | 10 (31.25) | 0 (0) | 0 (0) | 0 (0) |
| **Task Difficulty** | RT group | 24 (72.73) | 8 (24.24) | 0 (0) | 0 (0) | 0 (0) |
| Control group | 18 (56.25) | 13 (40.63) | 1 (3.13) | 0 (0) | 0 (0) |
| **Professional Demeanor** | RT group | 33 (100) | 0 (0) | 0 (0) | 0 (0) | 0 (0) |
| Control group | 29 (90.63) | 3 (9.38) | 0 (0) | 0 (0) | 0 (0) |
| **Schedule Coordination** | RT group | 24 (72.73) | 7 (21.21) | 2 (6.06) | 0 (0) | 0 (0) |
| Control group | 15 (46.88) | 15 (46.88) | 2 (6.25) | 0 (0) | 0 (0) |
| **Course Mastery** | RT group | 26 (78.79) | 3 (9.09) | 4 (12.12) | 0 (0) | 0 (0) |
| Control group | 8 (25) | 24 (75) | 0 (0) | 0 (0) | 0 (0) |
| **Overall assessment** | RT group | 27 (81.82) | 6 (18.18) | 0 (0) | 0 (0) | 0 (0) |
| Control group | 23 (71.88) | 9 (28.13) | 0 (0) | 0 (0) | 0 (0) |

**References:**

[1] Seynnes O, Fiatarone Singh MA, Hue O,et al.Physiological and functional responses to low-moderate versus high-intensity progressive resistance training in frail elders.*J Gerontol A Biol Sci Med Sci,*2004,59(5):503-509.

[2] Hess JA, Woollacott M, Shivitz N.Ankle force and rate of force production increase following high intensity strength training in frail older adults.*Aging Clin Exp Res,*2006,18(2):107-115.

[3] Lustosa LP, Silva JP, Coelho FM,et al.Impact of resistance exercise program on functional capacity and muscular strength of knee extensor in pre-frail community-dwelling older women: a randomized crossover trial.*Rev Bras Fisioter,*2011,15(4):318-324.

[4] Nagamatsu LS, Handy TC, Hsu CL,et al.Resistance training promotes cognitive and functional brain plasticity in seniors with probable mild cognitive impairment.*Arch Intern Med,*2012,172(8):666-668.

[5] Fiatarone Singh MA, Gates N, Saigal N,et al.The Study of Mental and Resistance Training (SMART) study—resistance training and/or cognitive training in mild cognitive impairment: a randomized, double-blind, double-sham controlled trial.*J Am Med Dir Assoc,*2014,15(12):873-880.

[6] Yoon DH, Kang D, Kim HJ,et al.Effect of elastic band-based high-speed power training on cognitive function, physical performance and muscle strength in older women with mild cognitive impairment.*Geriatr Gerontol Int,*2017,17(5):765-772.

[7] Greblo Jurakic Z, Krizanic V, Sarabon N,et al.Effects of feedback-based balance and core resistance training vs. Pilates training on cognitive functions in older women with mild cognitive impairment: a pilot randomized controlled trial.*Aging Clin Exp Res,*2017,29(6):1295-1298.

[8] Sahin UK, Kirdi N, Bozoglu E,et al.Effect of low-intensity versus high-intensity resistance training on the functioning of the institutionalized frail elderly.*Int J Rehabil Res,*2018,41(3):211-217.

[9] Hong SG, Kim JH, Jun TW.Effects of 12-Week Resistance Exercise on Electroencephalogram Patterns and Cognitive Function in the Elderly With Mild Cognitive Impairment: A Randomized Controlled Trial.*Clin J Sport Med,*2018,28(6):500-508.

[10] Yoon DH, Lee JY, Song W.Effects of Resistance Exercise Training on Cognitive Function and Physical Performance in Cognitive Frailty: A Randomized Controlled Trial.*J Nutr Health Aging,*2018,22(8):944-951.

[11] Tsai CL, Pai MC, Ukropec J,et al.Distinctive Effects of Aerobic and Resistance Exercise Modes on Neurocognitive and Biochemical Changes in Individuals with Mild Cognitive Impairment.*Curr Alzheimer Res,*2019,16(4):316-332.

[12] Mollinedo Cardalda I, López A, Cancela Carral JM.The effects of different types of physical exercise on physical and cognitive function in frail institutionalized older adults with mild to moderate cognitive impairment. A randomized controlled trial.*Arch Gerontol Geriatr,*2019,83:223-230.

[13] Chen, R., Wu, Q., Wang, D., et al. The Effects of Resistance Band Training on Lower Limb Muscle Strength and Quality of Life in Pre-frail Elderly Individuals. Chinese Journal of General Practice, 2019:22(31), 3857-3860.

[14] Liu, Y. The Effects of Elastic Band Flexibility Resistance Training on Improving Balance in Pre-frail Elderly Individuals. Systematic Medicine, 2020:5(19), 176-178.
